# Supplementary material for: Structural analysis of DNA–protein complexes regulating the restriction–modification system Esp1396I
Source: PubMed Central journal article supplement (PMC3758141; doi:10.1107/s174430911302126x), 2013-08-19
Supplement: f-69-00962-sup1.pdf [file f-69-00962-sup1.pdf]

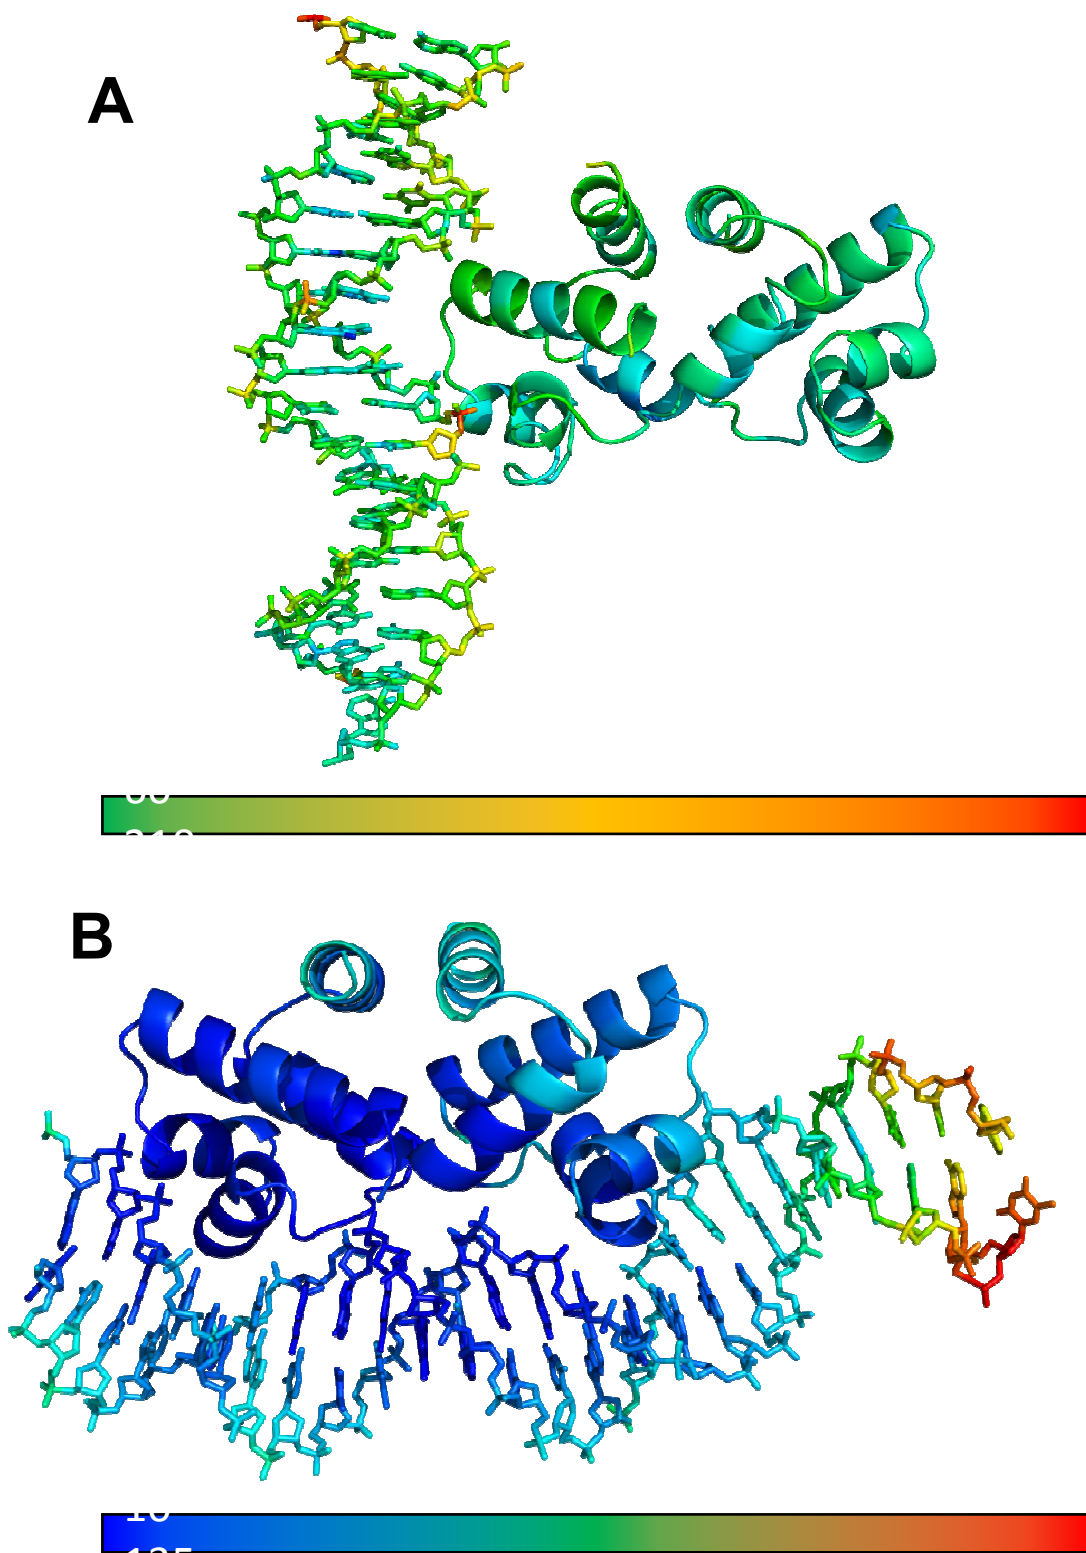

**Figure S1: B-Factors of the 190<sub>R</sub> and 250<sub>L</sub> structures. A: 190<sub>R</sub> and B: 250<sub>L</sub> structures coloured by B-factor (scale bars respective to the structure above).**
